# Supplementary material for: Mesostructured molecular solid material |Co(en)3|(Zr2F11H2O) with enhanced photoelectronic effect
Source: Royal Society of Chemistry journal article supplement (doi:10.1039/b902998b), 2009-01-01
Supplement: b902998b.pdf [file b902998b.pdf]

## Electronic Supplementary Information

### Mesostructured molecular solid material $[\text{Co}(\text{en})_3](\text{Zr}_2\text{F}_{11}\text{H}_2\text{O})$ with enhanced photoelectronic effect

Yu Du<sup>a,b</sup>, Jihong Yu<sup>c</sup>, Yuan Chen<sup>a</sup>, and Yanhui Yang<sup>a\*</sup>

<sup>a</sup> School of Chemical & Biomedical Engineering, Nanyang Technological University, 637459  
Singapore, Singapore

<sup>b</sup> College of Electronic Science & Engineering, Jilin University, Changchun 130012 P. R.  
China.

<sup>c</sup> State Key Laboratory of Inorganic Synthesis and Preparative Chemistry. College of  
Chemistry, Jilin University, Changchun 130012 P. R. China.

- Table S1 Atomic coordinates and equivalent isotropic displacement parameters for **1**.  
Table S2 Bond lengths and angles for **1**.  
Table S3 Hydrogen bonds for **1**. [Å and deg.]

Table S1

| Atom  | X        | Y       | Z       | U(eq) |
|-------|----------|---------|---------|-------|
| Zr(1) | 934(1)   | 1048(1) | 4597(1) | 20(1) |
| Zr(2) | 2438(1)  | 3214(1) | 3858(1) | 19(1) |
| Co(1) | 3111(1)  | 6917(1) | 3322(1) | 20(1) |
| F(1)  | -1275(4) | 315(2)  | 4901(2) | 27(1) |
| F(2)  | 325(4)   | 360(2)  | 3374(2) | 29(1) |
| F(3)  | 3238(4)  | 882(3)  | 4700(3) | 41(1) |
| F(4)  | -997(4)  | 1877(2) | 4325(3) | 32(1) |
| F(5)  | 1896(5)  | 2395(2) | 5044(2) | 30(1) |
| F(6)  | 1541(5)  | 1907(2) | 3431(2) | 31(1) |
| F(7)  | 226(4)   | 3627(3) | 3551(3) | 38(1) |
| F(8)  | 2974(5)  | 3957(2) | 5038(3) | 32(1) |
| F(9)  | 4753(4)  | 2793(2) | 4080(3) | 31(1) |
| F(10) | 2670(5)  | 3034(2) | 2418(2) | 31(1) |
| F(11) | 3158(6)  | 4403(3) | 3368(3) | 47(1) |
| O(1)  | 817(6)   | 1173(3) | 6146(3) | 30(1) |
| C(1)  | 2900(10) | 8735(5) | 2776(6) | 45(2) |
| C(2)  | 3863(10) | 8732(5) | 3720(5) | 41(2) |
| C(3)  | 391(8)   | 6099(5) | 3935(5) | 34(2) |
| C(4)  | 1684(8)  | 6032(5) | 4773(5) | 33(2) |
| C(5)  | 4422(8)  | 5874(4) | 1936(5) | 30(2) |
| C(6)  | 5738(8)  | 5952(4) | 2761(5) | 31(2) |
| N(1)  | 2910(6)  | 7839(3) | 2328(4) | 25(1) |
| N(2)  | 3450(6)  | 7921(4) | 4232(4) | 28(1) |
| N(3)  | 777(6)   | 6902(4) | 3370(4) | 29(1) |
| N(4)  | 3228(6)  | 6039(3) | 4368(4) | 26(1) |
| N(5)  | 2882(6)  | 5993(3) | 2342(4) | 24(1) |
| N(6)  | 5418(6)  | 6783(3) | 3285(4) | 25(1) |

Table S2

|                   |            |                   |            |
|-------------------|------------|-------------------|------------|
| Zr(1)-F(3)        | 1.945(4)   | Co(1)-N(5)        | 1.949(5)   |
| Zr(1)-F(2)        | 2.020(3)   | Co(1)-N(1)        | 1.961(5)   |
| Zr(1)-F(4)        | 2.044(4)   | Co(1)-N(6)        | 1.962(5)   |
| Zr(1)-F(1)#1      | 2.167(3)   | Co(1)-N(4)        | 1.970(5)   |
| Zr(1)-F(6)        | 2.200(4)   | Co(1)-N(2)        | 1.973(5)   |
| Zr(1)-O(1)        | 2.210(5)   | Co(1)-N(3)        | 1.976(5)   |
| Zr(1)-F(5)        | 2.234(3)   | F(1)-Zr(1)#1      | 2.167(3)   |
| Zr(1)-F(1)        | 2.247(4)   | C(1)-C(2)         | 1.471(10)  |
| Zr(1)-Zr(2)       | 3.6795(8)  | C(1)-N(1)         | 1.484(9)   |
| Zr(2)-F(7)        | 1.960(4)   | C(2)-N(2)         | 1.477(9)   |
| Zr(2)-F(8)        | 2.008(3)   | C(3)-N(3)         | 1.501(8)   |
| Zr(2)-F(11)       | 2.029(4)   | C(3)-C(4)         | 1.507(9)   |
| Zr(2)-F(9)        | 2.037(4)   | C(4)-N(4)         | 1.486(8)   |
| Zr(2)-F(10)       | 2.085(3)   | C(5)-N(5)         | 1.493(8)   |
| Zr(2)-F(6)        | 2.156(3)   | C(5)-C(6)         | 1.509(9)   |
| Zr(2)-F(5)        | 2.170(3)   | C(6)-N(6)         | 1.489(8)   |
| F(3)-Zr(1)-F(2)   | 98.19(17)  | F(8)-Zr(2)-F(6)   | 140.28(14) |
| F(3)-Zr(1)-F(4)   | 148.81(16) | F(11)-Zr(2)-F(6)  | 144.08(15) |
| F(2)-Zr(1)-F(4)   | 92.22(15)  | F(9)-Zr(2)-F(6)   | 93.28(15)  |
| F(3)-Zr(1)-F(1)#1 | 76.40(15)  | F(10)-Zr(2)-F(6)  | 71.46(14)  |
| F(2)-Zr(1)-F(1)#1 | 78.99(14)  | F(7)-Zr(2)-F(5)   | 93.54(15)  |
| F(4)-Zr(1)-F(1)#1 | 134.64(14) | F(8)-Zr(2)-F(5)   | 73.68(14)  |
| F(3)-Zr(1)-F(6)   | 78.86(16)  | F(11)-Zr(2)-F(5)  | 149.23(15) |
| F(2)-Zr(1)-F(6)   | 73.51(13)  | F(9)-Zr(2)-F(5)   | 89.82(14)  |
| F(4)-Zr(1)-F(6)   | 76.08(15)  | F(10)-Zr(2)-F(5)  | 137.24(13) |
| F(1)#1-Zr(1)-F(6) | 139.60(14) | F(6)-Zr(2)-F(5)   | 66.60(13)  |
| F(3)-Zr(1)-O(1)   | 96.04(18)  | F(7)-Zr(2)-Zr(1)  | 89.34(12)  |
| F(2)-Zr(1)-O(1)   | 148.29(16) | F(8)-Zr(2)-Zr(1)  | 107.57(11) |
| F(4)-Zr(1)-O(1)   | 90.05(17)  | F(11)-Zr(2)-Zr(1) | 176.09(13) |
| F(1)#1-Zr(1)-O(1) | 77.05(16)  | F(9)-Zr(2)-Zr(1)  | 92.34(11)  |
| F(6)-Zr(1)-O(1)   | 137.33(16) | F(10)-Zr(2)-Zr(1) | 103.91(10) |
| F(3)-Zr(1)-F(5)   | 76.76(16)  | F(6)-Zr(2)-Zr(1)  | 32.72(9)   |
| F(2)-Zr(1)-F(5)   | 138.20(13) | F(5)-Zr(2)-Zr(1)  | 33.89(9)   |
| F(4)-Zr(1)-F(5)   | 75.94(14)  | N(5)-Co(1)-N(1)   | 89.9(2)    |
| F(1)#1-Zr(1)-F(5) | 136.76(13) | N(5)-Co(1)-N(6)   | 85.3(2)    |
| F(6)-Zr(1)-F(5)   | 64.76(12)  | N(1)-Co(1)-N(6)   | 92.8(2)    |
| O(1)-Zr(1)-F(5)   | 72.79(16)  | N(5)-Co(1)-N(4)   | 92.9(2)    |
| F(3)-Zr(1)-F(1)   | 140.01(15) | N(1)-Co(1)-N(4)   | 176.4(2)   |
| F(2)-Zr(1)-F(1)   | 77.71(14)  | N(6)-Co(1)-N(4)   | 89.7(2)    |
| F(4)-Zr(1)-F(1)   | 70.93(13)  | N(5)-Co(1)-N(2)   | 174.6(2)   |

|                    |            |                    |            |
|--------------------|------------|--------------------|------------|
| F(1)#1-Zr(1)-F(1)  | 63.71(15)  | N(1)-Co(1)-N(2)    | 85.6(2)    |
| F(6)-Zr(1)-F(1)    | 134.78(13) | N(6)-Co(1)-N(2)    | 91.8(2)    |
| O(1)-Zr(1)-F(1)    | 73.20(16)  | N(4)-Co(1)-N(2)    | 91.7(2)    |
| F(5)-Zr(1)-F(1)    | 131.77(13) | N(5)-Co(1)-N(3)    | 90.4(2)    |
| F(3)-Zr(1)-Zr(2)   | 75.97(11)  | N(1)-Co(1)-N(3)    | 92.0(2)    |
| F(2)-Zr(1)-Zr(2)   | 105.43(10) | N(6)-Co(1)-N(3)    | 173.5(2)   |
| F(4)-Zr(1)-Zr(2)   | 72.92(10)  | N(4)-Co(1)-N(3)    | 85.6(2)    |
| F(1)#1-Zr(1)-Zr(2) | 152.38(10) | N(2)-Co(1)-N(3)    | 92.9(2)    |
| F(6)-Zr(1)-Zr(2)   | 31.98(9)   | Zr(1)#1-F(1)-Zr(1) | 116.29(15) |
| O(1)-Zr(1)-Zr(2)   | 105.45(13) | Zr(2)-F(5)-Zr(1)   | 113.32(15) |
| F(5)-Zr(1)-Zr(2)   | 32.79(9)   | Zr(2)-F(6)-Zr(1)   | 115.30(15) |
| F(1)-Zr(1)-Zr(2)   | 143.82(9)  | C(2)-C(1)-N(1)     | 110.6(6)   |
| F(7)-Zr(2)-F(8)    | 96.71(16)  | C(1)-C(2)-N(2)     | 108.1(6)   |
| F(7)-Zr(2)-F(11)   | 88.01(18)  | N(3)-C(3)-C(4)     | 106.7(5)   |
| F(8)-Zr(2)-F(11)   | 75.62(15)  | N(4)-C(4)-C(3)     | 106.2(5)   |
| F(7)-Zr(2)-F(9)    | 176.09(16) | N(5)-C(5)-C(6)     | 106.5(5)   |
| F(8)-Zr(2)-F(9)    | 86.15(15)  | N(6)-C(6)-C(5)     | 106.7(5)   |
| F(11)-Zr(2)-F(9)   | 90.13(18)  | C(1)-N(1)-Co(1)    | 109.6(4)   |
| F(7)-Zr(2)-F(10)   | 91.67(16)  | C(2)-N(2)-Co(1)    | 109.3(4)   |
| F(8)-Zr(2)-F(10)   | 147.46(15) | C(3)-N(3)-Co(1)    | 108.1(4)   |
| F(11)-Zr(2)-F(10)  | 73.31(15)  | C(4)-N(4)-Co(1)    | 109.2(4)   |
| F(9)-Zr(2)-F(10)   | 84.50(15)  | C(5)-N(5)-Co(1)    | 110.1(4)   |
| F(7)-Zr(2)-F(6)    | 86.22(16)  | C(6)-N(6)-Co(1)    | 109.9(4)   |

---

Symmetry transformations used to generate equivalent atoms:

#1 -x,-y,-z+1

Table S3

| D-H...A              | d(D-H)   | d(H...A) | d(D...A) | <(DHA)  |
|----------------------|----------|----------|----------|---------|
| O(1)-H(1W)...F(10)#2 | 0.81(6)  | 1.72(6)  | 2.524(6) | 171(6)  |
| O(1)-H(2W)...F(2)#1  | 0.86(11) | 1.76(11) | 2.609(6) | 171(10) |
| N(1)-H(1C)...F(9)#3  | 0.9      | 2.09     | 2.970(6) | 166.6   |
| N(1)-H(1D)...F(4)#4  | 0.9      | 2.28     | 3.028(6) | 139.8   |
| N(1)-H(1D)...F(7)#4  | 0.9      | 2.31     | 3.015(6) | 134.7   |
| N(2)-H(2C)...F(4)#5  | 0.9      | 2.24     | 3.095(7) | 157.8   |
| N(2)-H(2D)...F(9)#6  | 0.9      | 2.02     | 2.865(6) | 155.6   |
| N(3)-H(3D)...F(6)#4  | 0.9      | 2.13     | 3.005(6) | 163.9   |
| N(4)-H(4C)...F(11)   | 0.9      | 1.96     | 2.822(6) | 159.5   |
| N(4)-H(4D)...F(9)#6  | 0.9      | 2.32     | 3.134(6) | 149.9   |
| N(5)-H(5C)...F(11)   | 0.9      | 1.96     | 2.780(6) | 150.5   |
| N(5)-H(5D)...F(4)#4  | 0.9      | 2.13     | 2.980(6) | 157.1   |
| N(5)-H(5D)...F(2)#4  | 0.9      | 2.35     | 2.922(6) | 121.3   |
| N(6)-H(6C)...F(10)#3 | 0.9      | 1.88     | 2.736(6) | 157.3   |
| N(6)-H(6D)...F(8)#6  | 0.9      | 1.99     | 2.804(6) | 149.6   |

Symmetry transformations used to generate equivalent atoms:

|                    |                   |                      |
|--------------------|-------------------|----------------------|
| #1 -x,-y,-z+1      | #2 x,-y+1/2,z+1/2 | #3 -x+1,y+1/2,-z+1/2 |
| #4 -x,y+1/2,-z+1/2 | #5 -x,-y+1,-z+1   | #6 -x+1,-y+1,-z+1    |
